# Supplementary material
Source: PubMed Central journal article supplement (PMC4151764)
Supplement: 1405507111_pnas.201405507SI.pdf [file 1405507111_pnas.201405507SI.pdf]

# Supporting Information

Lock et al. 10.1073/pnas.1405507111

## SI Text

### 1. Candidate Gene Function Synopsis

**Microfibrillar Associated Protein 5.** The microfibrillar associated protein 5 (MFAP5, also known as MAGP2) gene encodes a 25-kDa microfibril-associated glycoprotein (1) that can activate Notch signaling (2) and has been shown to negatively affect serous ovarian cancer patient survival (3). However, this gene or gene product has not previously been described in association with lymphoma.

**Dermatan Sulfate Proteoglycan 3 Precursor.** The dermatan sulfate proteoglycan 3 precursor (EPYC) gene encodes a member of the small leucine-rich repeat proteoglycan family (epiphycan) and regulates fibrillogenesis by interacting with collagen fibrils and other extracellular matrix proteins; hence, it is involved in bone formation and also in establishing the ordered structure of cartilage through matrix organization. Increased EPYC mRNA expression has been observed in patients with invasive pancreatic ductal adenocarcinoma, compared with normal pancreatic tissues (4), but has not previously been associated with blood cancers.

**Protein Tyrosine Phosphatase, Receptor Type F.** Protein tyrosine phosphatase, receptor type F (PTPRF, or LAR) protein is member of the protein tyrosine phosphatase family of signaling molecules that regulate a variety of cellular processes including cell growth, differentiation, cell cycle, and oncogenic transformation. Two alternatively spliced transcript variants of this gene, which encode distinct proteins, have been reported. PTPRF possesses an intrinsic protein tyrosine phosphatase activity (5). PTPRF expression is significantly increased in thyroid carcinomas (6) and breast cancer (7).

**Aldehyde Dehydrogenase 1 Family, Member L1.** Aldehyde dehydrogenase 1 family, member L1 (ALDH1L1, or FDH) protein encoded by this gene belongs to the aldehyde dehydrogenase family and catalyzes the conversion of 10-formyltetrahydrofolate, NADP<sup>+</sup>, and water to tetrahydrofolate, NADPH, and CO<sub>2</sub> (8). Alternative splicing results in multiple transcript variants (9). Loss of function or expression of ALDH1L1 is associated with decreased apoptosis, increased cell motility, and cancer progression. ALDH1L1 is expressed in normal adult liver and down-regulated in liver cancer (10).

**Fatty Acid-Binding Protein 7.** Brain fatty acid-binding protein (FABP7, or BLBP) is a member of the FABP family of lipid chaperones that are involved in the uptake, storage, and intracellular trafficking of fatty acids (11). FABP7 is expressed in normal brain and is up-regulated in various solid cancers, including glioma (12), melanoma (13), renal cell carcinoma (14), and aggressive triple negative breast cancer (15) and is associated with poor prognosis. FABP7 has not been associated with blood cancers before this report, to our knowledge, and the native FABP7 promoter is not functional in normal blood cells.

### 2. Transposable Element-Gene Chimeric Sequences from RACE or RT-PCR

**LTR2-FABP7.** SUDHL4 cell-line [diffuse large B-cell lymphoma (DLBCL)] RT-PCR sequence (GenBank accession no. KM111186)

**ACTTCTTTCTTTGGAGGCAAAAATTGGGTATAAGAC-AATATGAGGGGTGGTCTCCTCCCTTAACCTGGTGGA-ATGCAACTGAAGGAGAAGGATTGGAGATCTGCATTATCA-**

**AAACAGCAAATCAACAAAAAGGCGTGGGCTTTGCCACTA-GGCAGGTGGGAAATGTGACCAACCAACGGTAATTA-TCAGTCAAGAAGGAGACAAAGTGGTCATCAGGACTCT-CAGCACATTCAAGAACACGGAGATTAGTTTCCAGCTG-GGAGAAGAGTTTGTGAAACCCTGCAGATGATAGAA-ACTGTAAGTCTGTTGTTAGCCTGGATGGAGACAAACTT-GTTCACATACAGAAATGGGATGGCAAAGAAACAAATT-TGTAAGAGAAATTAAGGATGGCAAATGGTTATGAC-CCTTACTTTTTGGTGTGTTGGTTGCTGTTCCCACTATG-AGAAGGCATAA**

In the red LTR2 sequence, light blue shows splice junctions, splicing into exon 2, then 3 and 4. In green, ATG is present in the alternative first exon. Bold type represents the translated portion of the first exon, specific to chimeric mRNA.

**MER57B-ALDH1L1.** Karpas 422 cell-line (DLBCL) RACE sequence (GenBank accession no. KM111187)

**CTGGnGTCTCTCTGATCTGCTGTGATTCTGAGGGCT-GCCCAATTTGTGAATCGTTCATTGCTCAATTAACCTTT-TTAAATTTAATTTGGCTGAAGTTTTTCTTTAACATGG-TGTCAGAAGCGGGATCCAAAGTACAGCTTCTAGCGAC-CCCCAGGAGTACTGAGTGAACAAGCAAGGTCCTTCCA-ACCCTCTGTACTACCTGAAGATTGCAGTGATTGGACAG-AGCCTGTTTGGCCAGGAAGTTTACTGCCACCTGAGGAA**

The MER57B sequence is shown in red; light blue is the splice junction, splicing into exon 2.

IM9 cell line RACE sequence (GenBank accession no. KM111188)

**TTTGTGAATCGTTGATTGCTCAATTAACCTTTTTTAA-ATTTAATTTGGCTGAAGTTTTTCTTTAACATGGTGTG-AGAAGCGGGATCCAAAGTACAGCTTCTAGCGACCCCC-AGGAGTACTGAGTGAACAAGCAAGGTCCTTCCAACCC-TCTGCTACCCTGAAGATTGCAGTGATTGGACAGAGC-CTGTTTGGCCAGGAAGTTTACTGCCACCTGAGGAAGG-AGGGCCACGAAGTGGTGGGTGTGTTCCACTGTTCCAGA-CAAGGATGGAAAGGCCAGCCCCCTGGGTCTGGAAGC-TGAGAAGGATGGAGTGCCCGTATTCAAGTACTACCCG-GTGGCGTGCAAAGGACAGGCTTTGCCTGATGTGGT-GGCAAAATACCAGGCTTTGGGGGCCGAGCTCAACGTC-CTGCCCTTCTGCAGCCAATTCATCCCCATGGAGATAAT-CAGTGCCCCCGGCATGGCTCCATCATCTATCACCCGT-CACTGCTCCCTAGGCACCGAGGGGCCCTGGCCATCA-ACTGGACCCTATTACGCGAGATAAGAAAGGGGGG-TTTTCCATCTTCTGGGCGGATGATGGTCTGGACACC-GGAGACCTGCTGCTGCAGAAGGAGTGTGAGGTGCTCC-CGGACGACACCGTGAGCACGCTGTACAACCGCTTCTC-TTCCCTGAAGGCATCAAAGGGATGGTGCAGGCCGTG-AGGCTGATCGCTGAGGGCAAAGCCCCCAGACTCCCTC-AGCCTGAGGAAGGAGCCACTATGAGGGGATTTCAGA-AGAAGGAGACGCCAAG**

The MER57B sequence is shown in red; light blue shows splice junctions, splicing into the second exon, then the third, fourth, and fifth. ATG present in exon 2 is shown in green.

**THE1A-MFAP5.** NUDUL1 cell line (DLBCL) RT-PCR sequence (GenBank accession no. KM111189)

**TAAGGTCTCCCCAGCCATGTGAAACTCCTCATTGTA-ACACACATTCTACGCTAGCCTGGCTTTCTTGCTCTCCC-TCATCTCATTGTTTTCAGCGGAGGCCAAATCTGAAGTCC-TTCCAGGGAGTGGCTCTGTTTCATCTTATTCGCCAGCC-AAAGTAGGAACAGCGTAAGAGGAGAGACACATTC-AGCAGCCAAAGGACTCGGTGGAAAGAGCAGAACC-**

ATAGACAATATGTCGCTCTTGGGACCCAAGGTGCTGC-TGTTTCTTGCTGCAT

The THE1A sequence is shown in red; light blue shows splice junctions, splicing into the eighth base of exon 1. ATG present in exon 2 is shown in green.

**L2-EPYC.** OCL-Ly3 cell line (DLBCL) RT-PCR sequence (GenBank accession no. KM111190)

GCCAACCAACCACCACTTTGAAAGGACTGCAGAGG-AAAACCTTTGTCAGGAGACAGCCAGATTCTTTTAAAGG-AAAGCTTGAAAAATGAAGACATTAGCAGGACTTGTTCTGGGACTTGTCATCTTTGATGCTGTGACTGCCCACTCTAGAGTCCATCAACTATGACTCAGAAACATATGATGCCACCTTAGAAGACCTGGATAATTTGTACAACATGAAAACATACTGTTGATAAAGTTGAGATTGAAATAGC-CACAGTGATGCCTTCAGGGAACAGAGAGCTCCTCACTCCACCCACAGCCTGAGAAGGCCAGGAAGAGGAAG-AGGAGGAGGAATCTACTCCAGGCTGATTGATGGTCTTCTCCCCAGGAGCCTGAATTCACAGGGTTCTGGGG-CCACACACAAATGAAGACTTTCCAACCTGTCTTTTGTG-TACTTGTATAAGTACCACCGTGTACTGTGATGACCATG-AACTTGATGCTATTCTCCGCTGCCAAAGAA

The L2a sequence is shown in red; light blue shows splice junctions, splicing into exon 2. ATG present in exon 2 is shown in green.

**LTR16A1-L2-PTPRF.** L591 cell line (HL) RT-PCR sequence (GenBank accession no. KM111191)

1. Penner AS, Rock MJ, Kielty CM, Shipley JM (2002) Microfibril-associated glycoprotein-2 interacts with fibrillin-1 and fibrillin-2 suggesting a role for MAGP-2 in elastic fiber assembly. *J Biol Chem* 277(38):35044–35049.
2. Miyamoto A, Lau R, Hein PW, Shipley JM, Weinmaster G (2006) Microfibrillar proteins MAGP-1 and MAGP-2 induce Notch1 extracellular domain dissociation and receptor activation. *J Biol Chem* 281(15):10089–10097.
3. Mok SC, et al. (2009) A gene signature predictive for outcome in advanced ovarian cancer identifies a survival factor: Microfibril-associated glycoprotein 2. *Cancer Cell* 16(6):521–532.
4. Buchholz M, et al. (2005) Transcriptome analysis of microdissected pancreatic intraepithelial neoplastic lesions. *Oncogene* 24(44):6626–6636.
5. Chagnon MJ, Uetani N, Tremblay ML (2004) Functional significance of the LAR receptor protein tyrosine phosphatase family in development and diseases. *Biochem Cell Biol* 82(6):664–75.
6. Konishi N, et al. (2003) Overexpression of leucocyte common antigen (LAR) P-subunit in thyroid carcinomas. *Br J Cancer* 88(8):1223–1228.
7. Yang T, Zhang JS, Massa SM, Han X, Longo FM (1999) Leukocyte common antigen-related tyrosine phosphatase receptor: increased expression and neuronal-type splicing in breast cancer cells and tissue. *Mol Carcinog* 25(2):139–149.

AAGGAGACAGCCACGCAAATATCTGGGAAAAGAG-CTCCAGGTGCCATAGGAGGAGCGGCGTCAGAAGGG-ACTGATGACTGATTGGACAGTGGTGCAGGAGGGAAG-GTCTCTGCATGTCAGTGATTAATGCTGAAGATGCCA-CTGCCTGAGACGGGCAGTATTGAAGGAAGGAGTGGAG-GCCCTGGTGCCCGCCCTTGGTGCTGAGTATCCAGCAA

L2 is shown in red; light blue shows splice junctions, splicing into an intronic region then into exon 2. ATG was present in exon 3 but not sequenced.

### 3. Native FABP7 Amino Acid Sequence Compared with Chimeric FABP7 Amino Acid Sequence

Native FABP7 amino acid sequence: MVEAFCATWKLTLN-SQNFDEYMKALGVGFATROVGNVTKPTVIISQEGDKVVIR-TLSTFKNTEISFQLGEEFDETTADDRNCKSVVSLDGDKLVH-IQKWDGKETNFVREIKDGKVMMLTFGDVVAVRHYEKA

Chimeric FABP7 predicted amino acid sequence derived from SUDHL-4 amplification and sequencing:

MQLKEKDWRSALIKTANQQKGVGFATROVGNVTKP-TVIISQEGDKVVIRTLSTFKNTEISFQLGEEFDETTADDRN-CKSVVSLDGDKLVHIQKWDGKETNFVREIKDGKVMMLTFGDVVAVRHYEKA

In the underlined sequence, different first exons result in different amino acid sequences. Red highlighting shows that the conserved nuclear localization sequence [conserved K (lysine)] is missing in chimeric FABP7.

8. Krupenko SA (2009) FDH: an aldehyde dehydrogenase fusion enzyme in folate metabolism. *Chem Biol Interact* 178(1-3):84–93.
9. Black WJ, et al. (2009) Human aldehyde dehydrogenase genes: Alternatively spliced transcriptional variants and their suggested nomenclature. *Pharmacogenet Genomics* 19(11):893–902.
10. Chen XQ, He JR, Wang HY (2012) Decreased expression of ALDH1L1 is associated with a poor prognosis in hepatocellular carcinoma. *Med Oncol* 29(3):1843–1849.
11. Feng L, Hatten ME, Heintz N (1994) Brain lipid-binding protein (BLBP): A novel signaling system in the developing mammalian CNS. *Neuron* 12(4):895–908.
12. Liang Y, et al. (2005) Gene expression profiling reveals molecularly and clinically distinct subtypes of glioblastoma multiforme. *Proc Natl Acad Sci USA* 102(16):5814–5819.
13. Slipicevic A, et al. (2008) The fatty acid binding protein 7 (FABP7) is involved in proliferation and invasion of melanoma cells. *BMC Cancer* 8:276.
14. Seliger B, et al. (2005) Identification of fatty acid binding proteins as markers associated with the initiation and/or progression of renal cell carcinoma. *Proteomics* 5(10):2631–2640.
15. Liu RZ, et al. (2012) A fatty acid-binding protein 7/RXR $\beta$  pathway enhances survival and proliferation in triple-negative breast cancer. *J Pathol* 228(3):310–321.





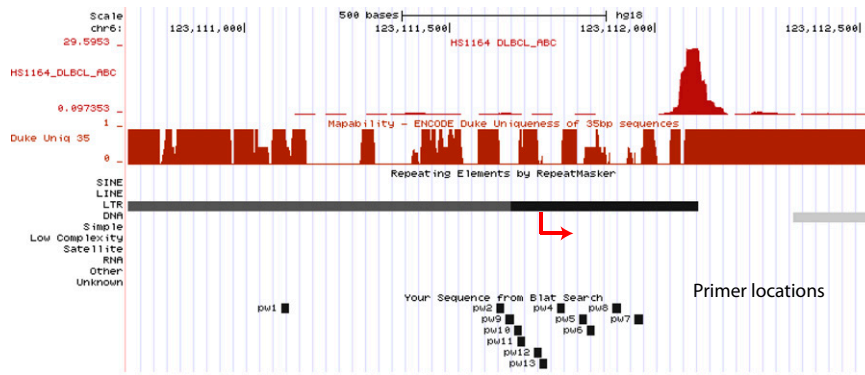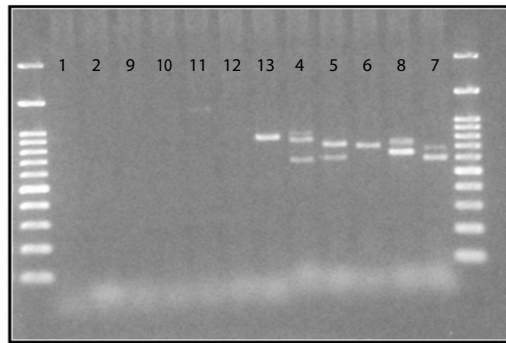

Primer walking RT-PCR result

**Fig. S2.** Primer walking for LTR2-*FABP7*. Hg18 UCSC genome browser screenshot of the LTR2 upstream of *FABP7* putatively acting as a promoter showing the peak of reads for one DLBCL sample. Note that the mappability of the region around the localized transcription start site is low, resulting in a lack of reads mapping closer to it. The RT-PCR product obtained to confirm presence of LTR2-*FABP7* chimera is shown along with all of the primers used for primer walking in the Blat track. On the RT-PCR gel, a 100-bp ladder is shown and numbers correspond to primer names in the genome browser screenshot.

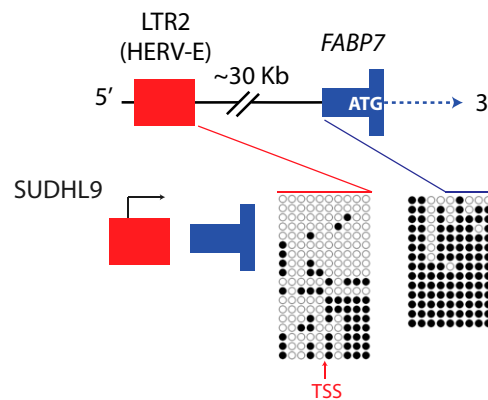

**Fig. S3.** Bisulfite sequencing of native and TE promoters for *FABP7* in the SUDHL9 DLBCL cell line. Gene scheme is the same as in Fig. 1B; filled circles represent methylated CpGs, empty circles represent unmethylated CpGs, and each row represents an independent clone. The localization of CpGs relative to the DNA sequence is shown with colored lines. This cell line was inconsistently positive for the chimeric transcript by RT-PCR but negative for expression from the native promoter, and protein expression was not detectable (Fig. 3A).



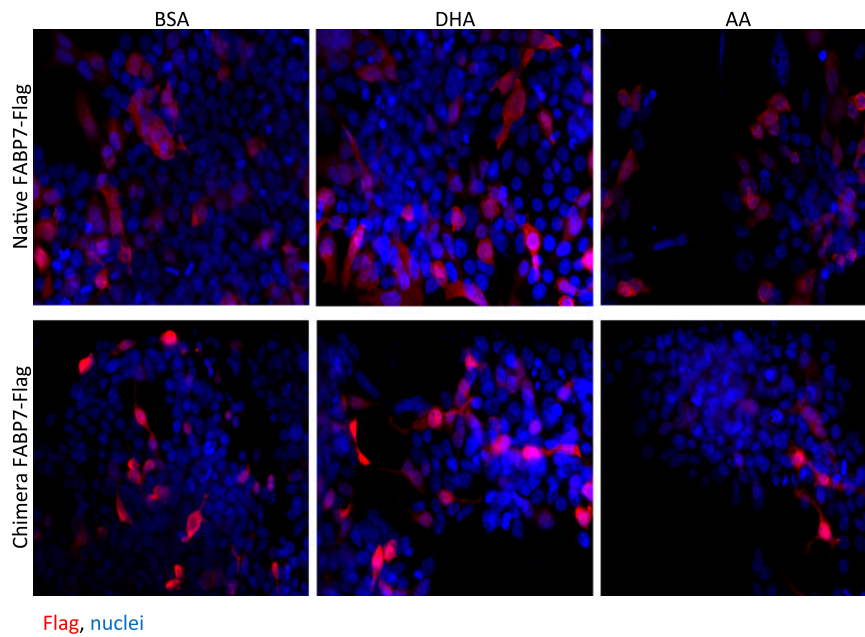

**Fig. S5.** cDNAs encoding native or chimeric FABP7 were cloned into the pCMV-3Tag (Flag) expression vector (Agilent), transfected into HEK293 cells by calcium phosphate precipitation, and treated with BSA (vehicle), DHA, or AA as previously. Transfected FABP7-Flag localization was assessed by Flag immunofluorescence.

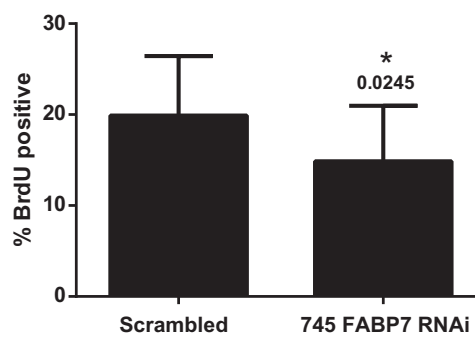

**Fig. S6.** SUDHL4 were stably transfected with RNAi vectors targeting FABP7 (745) or a scrambled control and subjected to BrdU incorporation assay, assessed by FACS analysis. Representative of two independent experiments.





**Table S1. Primers used in this study: 5' RACE**

| ALDH1L1                 | Primer sequence                       |
|-------------------------|---------------------------------------|
| RLM 5'RACE inner primer | CGCGGATCCGAACACTGCGTTTGTGCTGGCTTTGATG |
| ALDH1L1 exon 2 forward  | CCTCAGGTGGCAGTAACTTC                  |

**Table S2. Primers used in this study: RT-PCR**

| Target          | Forward                  | Reverse                  |
|-----------------|--------------------------|--------------------------|
| GABPDH          | CATGAGAAGTATGACAACAGCCTC | GTTGCTGTAGCCAAATTCGTTGTC |
| FABP7 native    | GCTACCTGGAAGCTGACCA      | CTGAAGAGCTCTTCCAAGCC     |
| FABP7 chimera   | TGGAATGCAACTGAAGGAGA     | CTGAAGAGCTCTTCCAAGCC     |
| FABP7 total     | TGGATGGAGACAAACTTGTTC    | TATGCCCTTCTCATAGTGGCGA   |
| EPYC native     | GCTCTGCATCCTCAGTCACT     | TTCTTTGGCAGCGGAGGAAT     |
| EPYC chimera    | GCCAACCAACCACCCTTTG      | TTCTTTGGCAGCGGAGGAAT     |
| EPYC total      | ATTCTCCGCTGCCAAAGAA      | GTGGCAGAGGGATGTGGTC      |
| PTPRF native    | TGGGTTCTCCTGTAGCTTGG     | GCAGAGGAGTGGGAGCAG       |
| PTPRF chimera   | GGGAACTGACCTAACACAGA     | TGCTGGATACTCAGCACCAA     |
| PTPRF total     | GAGGACCAGACTGGGCTGT      | GAACGCAGCTGCTTGTATG      |
| ALDH1L1 native  | AGTGAACACACCCACCCTTC     | GGTCTGCACCAACCTCAGTT     |
| ALDH1L1 chimera | AGTGAACACACCCACCCTTC     | TTGTGAATCGTTCATGTGTC     |
| ALDH1L1 total   | TAACTCCAGGCCATCACACA     | AGAGGCCATTCACAACTGGA     |
| MFAP5 native    | GTGCAATATCAGCCAAA        | ATTCCAGCCTCATTG          |
| MFAP5 chimera   | ATGCAGCAAGAAACAGCAGC     | TAAGGTCTCCCCAGCCATGT     |
| MFAP5 total     | AAGGAAGACTTGCCAGGCAA     | CGGCCGGTTAAACAATGCAT     |

**Table S3. Primers used in this study: Bisulfite analysis**

| Gene promoter                | Primer sequence                                       | Primer sequence                                         |
|------------------------------|-------------------------------------------------------|---------------------------------------------------------|
| MFAP5 native, first round    | <b>MFAP5 BIS-S1</b><br>TTTAGGGTTTTAGGTAATTAATAATTTAT  | <b>MFAP5 BIS-AS1</b><br>ACAAAAAAATCTAAATATATAAATCAAAA   |
| MFAP5 native, second round   | <b>MFAP5 BIS-S1</b><br>TTTAGGGTTTTAGGTAATTAATAATTTAT  | <b>MFAP5 BIS-AS5</b><br>AATCACATCATTACACTCCAACCTA       |
| MFAP5 LTR, first round       | <b>MFAP5 BIS-S2</b><br>TTTAATTTTTGTTTGTATTAGTTTTAAA   | <b>MFAP5 BIS-AS3</b><br>AAAACAAAACAAAACAAACCATTG        |
| MFAP5 LTR, second round      | <b>MFAP5 BIS-S2</b><br>TTTAATTTTTGTTTGTATTAGTTTTAAA   | <b>MFAP5 BIS-AS4</b><br>AAAATCATCTTTCCCATACTATTCTC      |
| FABP7 native, first round    | <b>FABGeneBisulF</b><br>GGGGTTTTTATTGTGATTAGTTTT      | <b>FABGeneBisulR1</b><br>TTATTACCTACCTAAAACCTTCATATACTC |
| FABP7 native, second round   | <b>FABGeneBisulF</b><br>GGGGTTTTTATTGTGATTAGTTTT      | <b>FABGeneBisulR2</b><br>CTCATCAAAATCTAACTATTAATCAACTT  |
| FABP7 LTR, first round       | <b>FABLTRBisulF</b><br>TTGGTTAGAGTTTTTTGTAGGGATG      | <b>FABLTRBisulR1</b><br>TTC AATTACATTTCCACAAATTTAAA     |
| FABP7 LTR, second round      | <b>FABLTRBisulF</b><br>TTGGTTAGAGTTTTTTGTAGGGATG      | <b>FABLTRBisulR2</b><br>AAAAAAAACCACCCCTCATATTATC       |
| ALDH1L1 native, first round  | <b>ALDH1L1geneF1</b><br>GGGTAGGTTAGATTTTTGTGAGT       | <b>ALDH1L1geneF2</b><br>GAAATGAGGTTGGTGTAGATT           |
| ALDH1L1 native, second round | <b>ALDH1L1geneF1</b><br>GGGTAGGTTAGATTTTTGTGAGT       | <b>ALDH1L1geneR</b><br>AAAAACAAAACACTATTTTTCTCTC        |
| ALDH1L1 LTR, first round     | <b>ALDH1L1LTRF1</b><br>TTATTTTGAGAGATTAATGGATATAAATAG | <b>ALDH1L1LTRF2</b><br>TTTGATATTATGTAAAAGAAAAATTTTAG    |
| ALDH1L1 LTR, second round    | <b>ALDH1L1LTRF1</b><br>TTATTTTGAGAGATTAATGGATATAAATAG | <b>ALDH1L1LTRR</b><br>ACAAAACATAAAACAAAACAAAAC          |

**Table S4. Primers used in this study: Primer walking**

| Primer          | Sequence              |
|-----------------|-----------------------|
| Reverse primer  |                       |
| orfF4Rev        | CTGAAGAGCTCTTCCAAGCC  |
| Forward primers |                       |
| FABP7 pw-1      | TGCCTGACCCATATTTCCCTC |
| FABP7-pw2       | AATCACCACGTTTCTGGTC   |
| FABP7-pw3       | GGTTGTCTGCTTGTGGATT   |
| FABP7 pw4       | TGAGCAATTCCTGTCCCTTT  |
| FABP7 pw5       | AGGGTCGTGATTGATTGAGC  |
| FABP7 pw6       | CAAGCAGGGGTACATGACT   |
| FABP7 pw7       | CCAATTAGGTCAGGGTTGA   |
| FABP7 pw8       | CAGGGATTTTCACAGTGCTTT |
| FABP7 pw9       | GGACCAAGAAATGTAGCAGGA |
| FABP7 pw10      | GACAAGCCGAGACAAAACC   |
| FABP7 pw11      | GCAGACAAAACCCCTCAGAC  |
| FABP7 pw12      | GTTTATTCCACCGGAGCAT   |
| FABP7 pw13      | GGAGCATCAGCAAGACTCCT  |

**Dataset S1. Bioinformatics pipeline output of the 98 chimeric genes where the gene is silent in normal (RPKM <1) and the following criteria are met in at least two DLBCL libraries: (i) presence of at least three chimeric reads and (ii) expression in DLBCL libraries (RPKM ≥1)**

#### [Dataset S1](#)

All of the different RefSeq symbols with the number of chimeric reads and RPKM for each library where the parameters are met are shown. Each Refseq gene name is shown by alternating colors.
